# Supplementary material
Source: PubMed Central journal article supplement (PMC4892800)
Supplement: rspb20160477supp4.pdf [file rspb20160477supp4.pdf]

| <b>Patch</b> | <b>Number of <i>Eurosta</i> Lost</b> |
|--------------|--------------------------------------|
| 3            | 1                                    |
| 6            | 2                                    |
| 8            | 1                                    |
| 13           | 1                                    |
| 17           | 1                                    |
| 21           | 1                                    |
| 23           | 1                                    |
