# Supplementary material
Source: PubMed Central journal article supplement (PMC4892800)

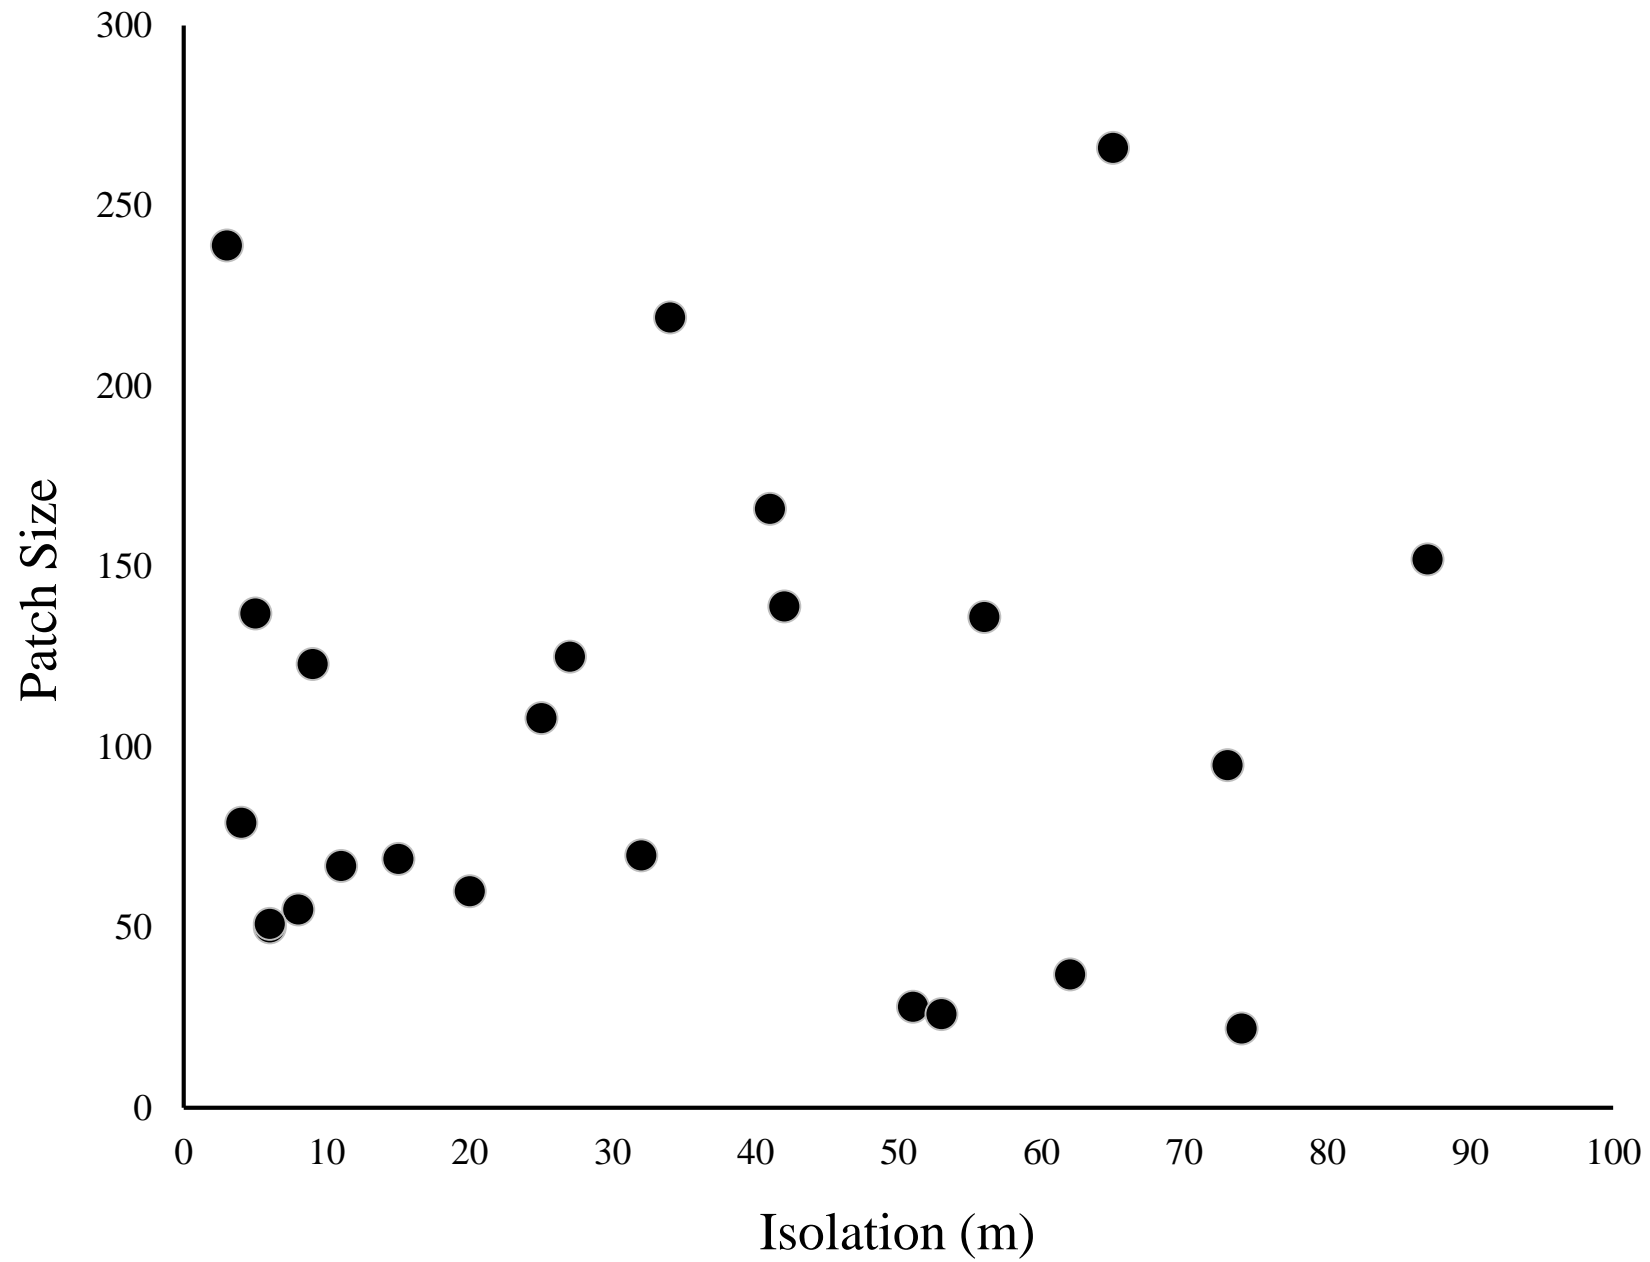

Supplement: rspb20160477supp1.pdf [file rspb20160477supp1.pdf]

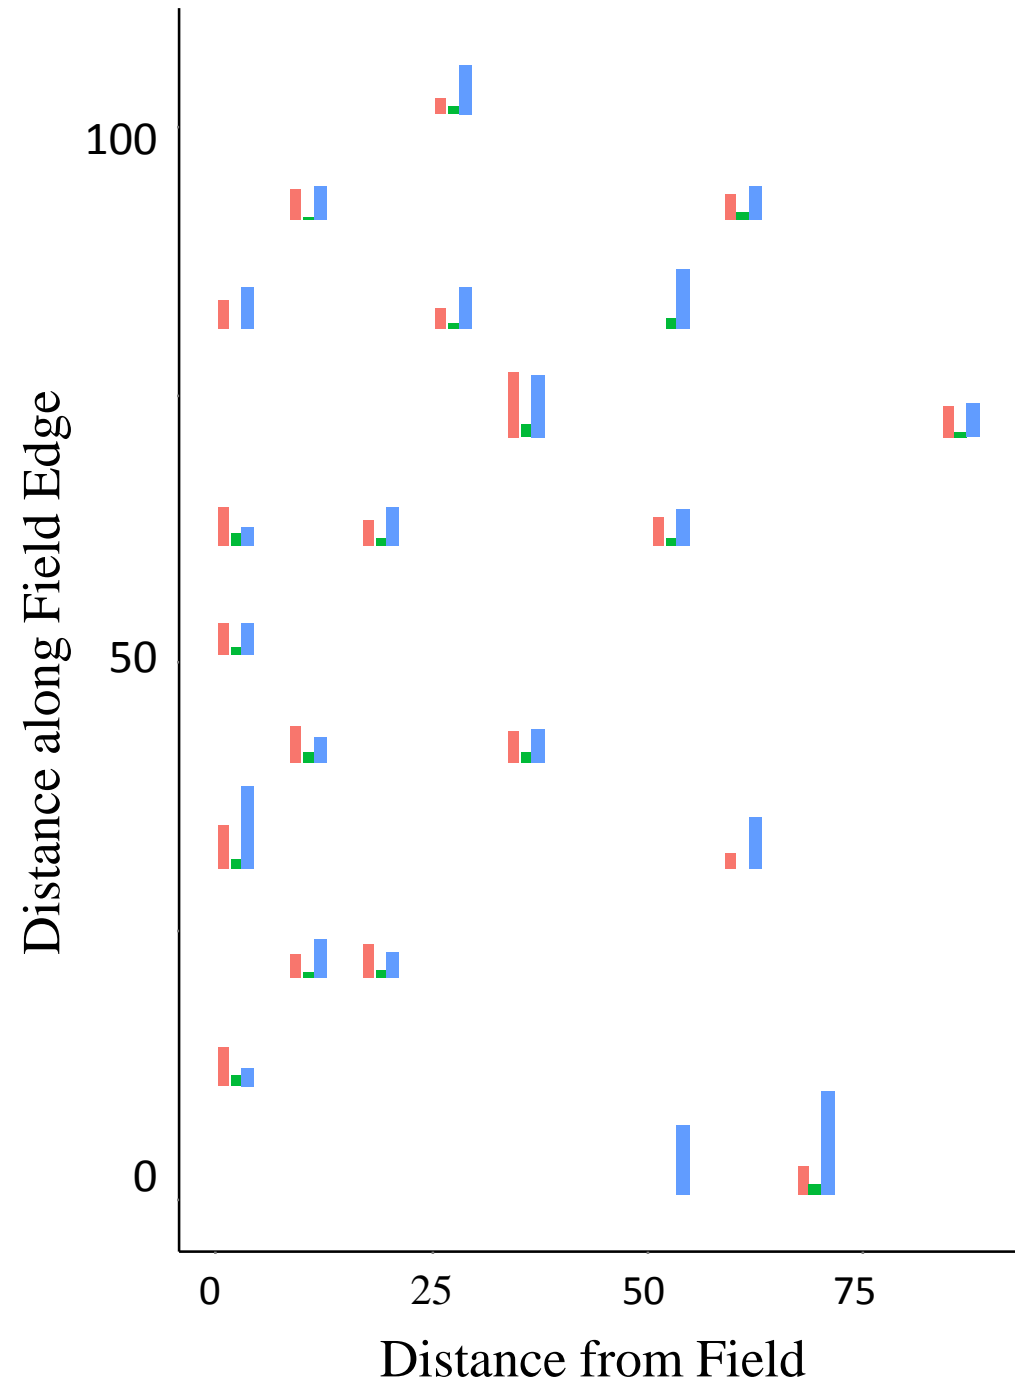

Supplement: rspb20160477supp2.pdf [file rspb20160477supp2.pdf]

B) Gall Diameter (mm)

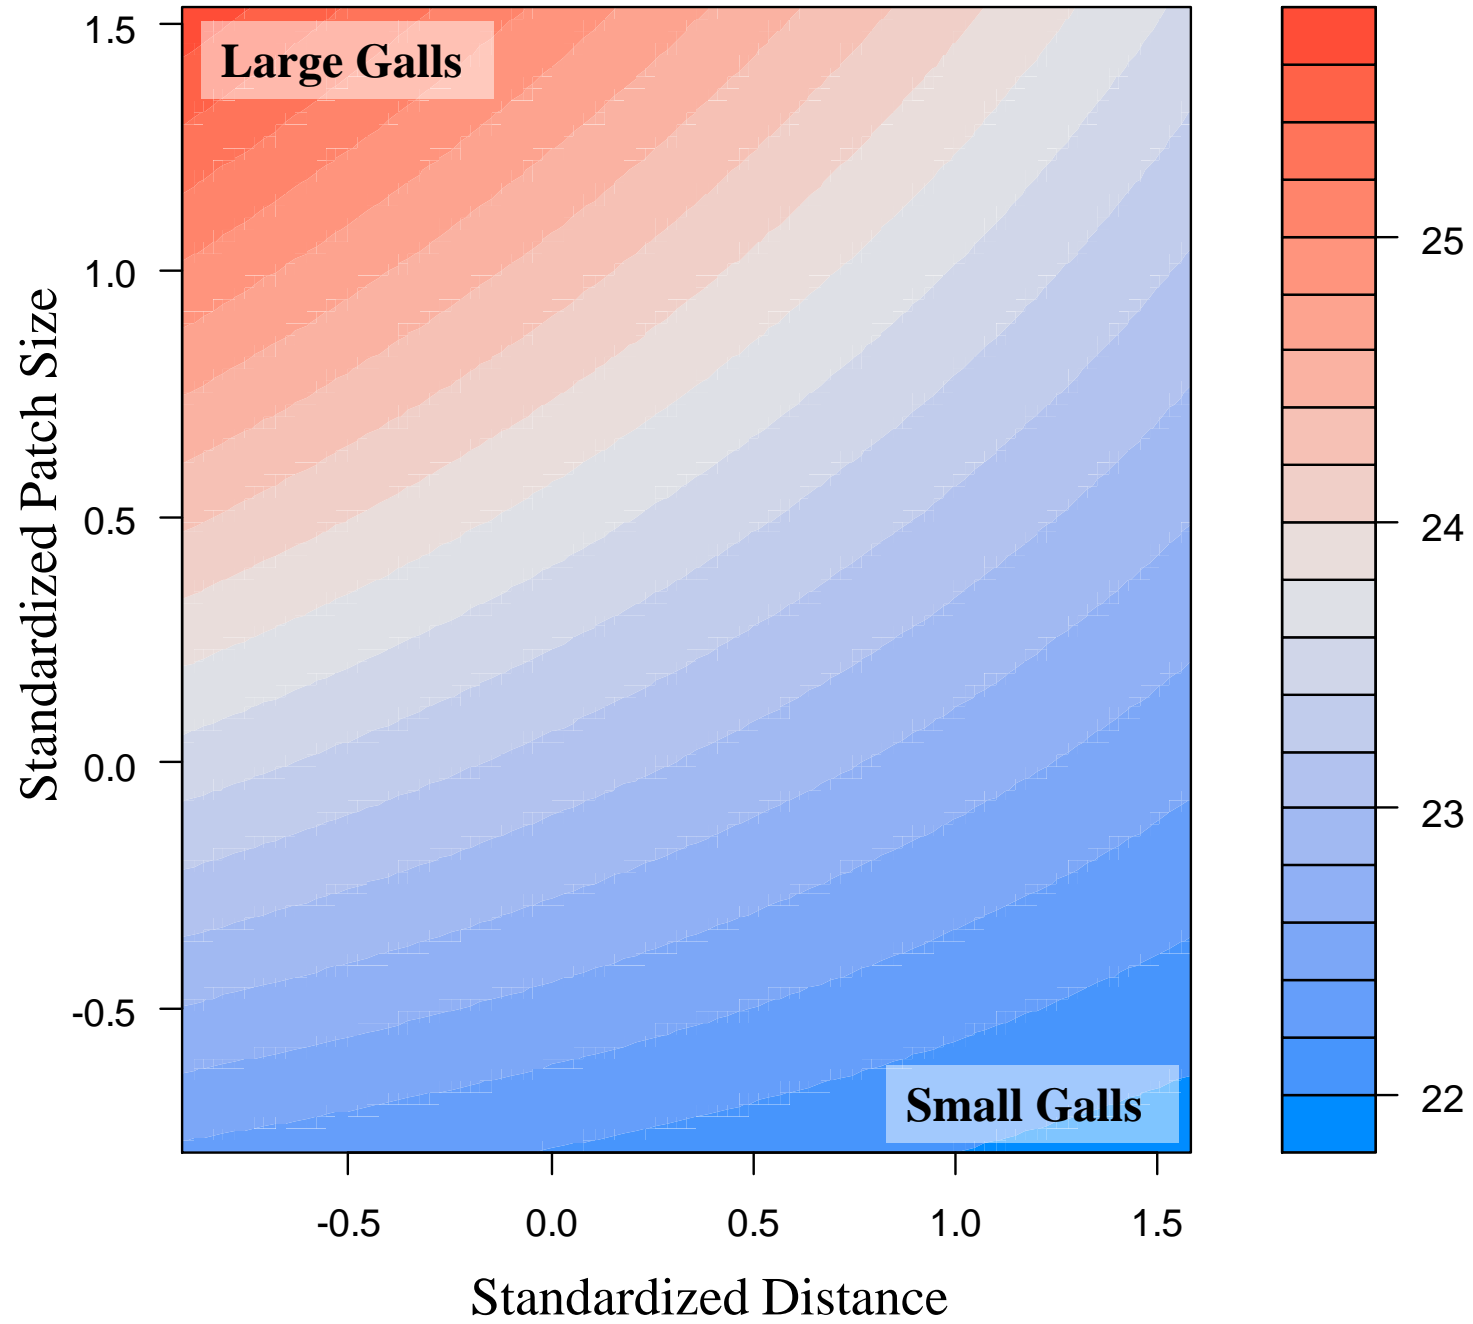

Supplement: rspb20160477supp3.pdf [file rspb20160477supp3.pdf]
